# Supplementary material for: Apoplastomes of contrasting cacao genotypes to witches’ broom disease reveals differential accumulation of PR proteins
Source: Front Plant Sci. 2024 May 16;15:1387153. doi: 10.3389/fpls.2024.1387153 (PMC11137319; doi:10.3389/fpls.2024.1387153)
Supplement: Supplementary file 2 [file Table_1.xlsx]

## Sheet: CATONGO
	Supplementary table – Blast X and relative quantification of transcripts
		TRANSCRIPT	Identified Protein	Query cover	e-value	Percent Identity	ID protein
	1	>lcl_NC_030857.1_mrna_XM_007017808.2_26401	PREDICTED: CO(2)-response secreted protease isoform X2	0.82	0	1	XP_007017870.2
	2	>lcl_NC_030857.1_mrna_XM_007017133.2_25900	PREDICTED: subtilisin-like protease SBT1.9	0.87	0	1	XP_007017195.2
	3	>lcl_NC_030857.1_mrna_XM_007017859.2_26442	PREDICTED: plastocyanin	0.61	7e-79	1	XP_007017921.1
	4	>lcl_NC_030857.1_mrna_XM_007020147.2_28184	PREDICTED: laccase-14	0.92	0	1	XP_007020209.2
	5	>lcl_NC_030855.1_mrna_XM_007024412.2_22171	PREDICTED: cysteine-rich repeat secretory protein 38	0.66	2e-159	1	XP_007024474.2
	6	>lcl_NC_030854.1_mrna_XM_007030494.2_20288	PREDICTED: uncharacterized protein LOC18600177	0.78	0	1	XP_007030556.2
	7	>lcl_NC_030853.1_mrna_XM_007033487.2_15101	PREDICTED: non-specific lipid-transfer protein 1	0.41	3e-60	1	XP_007033549.2
	8	>lcl_NC_030853.1_mrna_XM_007033527.2_15127	PREDICTED: cationic peroxidase 1	0.8	0	1	XP_007033589.2
	9	>lcl_NC_030851.1_mrna_XM_007042965.2_6731	PREDICTED: beta-xylosidase/alpha-L-arabinofuranosidase 2	0.78	0	1	XP_007043027.2
	10	>lcl_NC_030850.1_mrna_XM_007052272.2_4800	PREDICTED: uclacyanin-3	0.58	9e-74	1	XP_007052334.2
	11	>lcl_NC_030853.1_mrna_XM_018119357.1_16759	PREDICTED: exopolygalacturonase	0.97	0	1	XP_017974846.1
	12	>lcl_NC_030854.1_mrna_XM_018122147.1_19941	PREDICTED: superoxide dismutase	0.54	8e-101	1	XP_017977636.1
	13	>lcl_NC_030851.1_mrna_XM_018115786.1_6828	PREDICTED: alpha-galactosidase isoform X1	0.71	0	1	XP_017979043.1
	14	>lcl_NC_030859.1_mrna_XM_018128586.1_33416	PREDICTED: serine/threonine-protein kinase-like protein CCR2	0.84	0	1	XP_017984075.1
	15	>lcl_NC_030857.1_mrna_XM_007020152.2_28189	PREDICTED: laccase-14	0.8	0	1	XP_007020214.1
	16	>lcl_NC_030854.1_mrna_XM_007028955.2_19092	PREDICTED: peroxidase A2	0.73	0	1	XP_007029017.2
	17	>lcl_NC_030853.1_mrna_XM_007033525.2_15125	PREDICTED: peroxidase 70	0.89	0	1	XP_007033587.2
	18	>lcl_NC_030852.1_mrna_XM_007040102.2_12731	PREDICTED: thaumatin-like protein	0.69	2e-149	1	XP_007040164.2
	19	>lcl_NC_030854.1_mrna_XM_018121579.1_20289	PREDICTED: pathogenesis-related protein PR-4A	0.72	2e-164	1	XP_017977068.1
	20	>lcl_NC_030857.1_mrna_XM_018126160.1_26400	PREDICTED: CO(2)-response secreted protease isoform X3	0.78	0	1	XP_017981649.1

## Sheet: CONTROL1
CONTROL
	Name	TPM (1)	TPM (2)	TPM (3)	TPM (4)	TPM (5)	Mean	Protein
1	>lcl_NC_030857.1_mrna_XM_007017808.2_26401	5648257	0,279600	2096580	2188937	0,395512	3311258	PREDICTED: CO(2)-response secreted protease isoform X2
2	>lcl_NC_030857.1_mrna_XM_007017133.2_25900	16758154	19080039	7025809	6413656	41666301	1.81888e+07	PREDICTED: subtilisin-like protease SBT1.9
3	>lcl_NC_030857.1_mrna_XM_007017859.2_26442	3303913918	4553758312	5056738510	4884346214	1620176170	3.88379e+09	PREDICTED: plastocyanin
4	>lcl_NC_030857.1_mrna_XM_007020147.2_28184	10455422	9613904	5351647	10674661	12106944	9.64052e+06	PREDICTED: laccase-14
5	>lcl_NC_030855.1_mrna_XM_007024412.2_22171	0,607458	0,422492	18865315	0,229712	0,000000	18865315	PREDICTED: cysteine-rich repeat secretory protein 38
6	>lcl_NC_030854.1_mrna_XM_007030494.2_20288	91204527	2567037010	151819624	207913287	1190261383	8.41647e+08	PREDICTED: uncharacterized protein LOC18600177
7	>lcl_NC_030853.1_mrna_XM_007033487.2_15101	27928331	96553695	46535172	49088594	60292608	56079680	PREDICTED: non-specific lipid-transfer protein 1
8	>lcl_NC_030853.1_mrna_XM_007033527.2_15127	1650519	0,697840	1916873	1213143	1735394	1.62898e+06	PREDICTED: cationic peroxidase 1
9	>lcl_NC_030851.1_mrna_XM_007042965.2_6731	11341911	103849729	37509169	9746764	121347319	5.6759e+07	PREDICTED: beta-xylosidase/alpha-L-arabinofuranosidase 2
10	>lcl_NC_030850.1_mrna_XM_007052272.2_4800	12323751	8112369	49496136	32274482	3775744	2.11965e+07	PREDICTED: uclacyanin-3
11	>lcl_NC_030853.1_mrna_XM_018119357.1_16759	0,011579	0,000000	0,028011	0,000000	0,012715	0,010461	PREDICTED: exopolygalacturonase
12	>lcl_NC_030854.1_mrna_XM_018122147.1_19941	445640151	240739403	210965273	230215817	516080464	3.28728e+08	PREDICTED: superoxide dismutase
13	>lcl_NC_030851.1_mrna_XM_018115786.1_6828	8239869	13918588	1792407	3933883	11123638	7801677	PREDICTED: alpha-galactosidase isoform X1
14	>lcl_NC_030859.1_mrna_XM_018128586.1_33416	0,150564	0,390261	0,123382	0,219063	0,625314	0,3017168	PREDICTED: serine/threonine-protein kinase-like protein CCR2
15	>lcl_NC_030857.1_mrna_XM_007020152.2_28189	18489063	69827871	8164898	11675565	135743641	4.87802e+07	PREDICTED: laccase-14
16	>lcl_NC_030854.1_mrna_XM_007028955.2_19092	11726710	5815858	6287359	22340109	4254101	1.00848e+07	PREDICTED: peroxidase A2
17	>lcl_NC_030853.1_mrna_XM_007033525.2_15125	0,000000	0,039617	0,000000	0,000000	0,000000	0,0079234	PREDICTED: peroxidase 70
18	>lcl_NC_030852.1_mrna_XM_007040102.2_12731	1689096	1017440	19555798	2062640	0,436366	6.08124e+06	PREDICTED: thaumatin-like protein
19	>lcl_NC_030854.1_mrna_XM_018121579.1_20289	18785542	85541221	26261840	411804746	6740962	1.09827e+08	PREDICTED: pathogenesis-related protein PR-4A
21	>lcl_NC_030857.1_mrna_XM_018126160.1_26400	1441363	1158529	1022677	1144151	1366807	1.22671e+06	PREDICTED: CO(2)-response secreted protease isoform X3

## Sheet: INFECTED1
Infected
	Name	TPM (1)	TPM (2)	TPM (3)	TPM (4)	TPM (5)	Mean	Protein
1	>lcl_NC_030857.1_mrna_XM_007017808.2_26401	0,097079	0,611890	0,076812	0,085455	0,066291	0,1875054	PREDICTED: CO(2)-response secreted protease isoform X2
2	>lcl_NC_030857.1_mrna_XM_007017133.2_25900	22596444	11180513	7466241	11628344	17142595	1.40028e+07	PREDICTED: subtilisin-like protease SBT1.9
3	>lcl_NC_030857.1_mrna_XM_007017859.2_26442	742971600	432669624	2028998188	2098872182	3339329826	1728568284	PREDICTED: plastocyanin
4	>lcl_NC_030857.1_mrna_XM_007020147.2_28184	41795732	8913474	21134113	8970410	8009847	1.77647e+07	PREDICTED: laccase-14
5	>lcl_NC_030855.1_mrna_XM_007024412.2_22171	12540707	16649989	7877891	11856008	40583870	17901693	PREDICTED: cysteine-rich repeat secretory protein 38
6	>lcl_NC_030854.1_mrna_XM_007030494.2_20288	1146834571	810310866	1668579905	1190228619	1604685453	1.28413e+09	PREDICTED: uncharacterized protein LOC18600177
7	>lcl_NC_030853.1_mrna_XM_007033487.2_15101	57020093	46829121	59033587	88855842	74460081	6.52397e+07	PREDICTED: non-specific lipid-transfer protein 1
8	>lcl_NC_030853.1_mrna_XM_007033527.2_15127	11540617	17793191	12303920	9746529	20980876	1.4473e+07	PREDICTED: cationic peroxidase 1
9	>lcl_NC_030851.1_mrna_XM_007042965.2_6731	59184330	104727700	57758521	72578394	107848251	8.04194e+07	PREDICTED: beta-xylosidase/alpha-L-arabinofuranosidase 2
10	>lcl_NC_030850.1_mrna_XM_007052272.2_4800	58659116	70059533	48486196	19252863	19823893	4.32563e+07	PREDICTED: uclacyanin-3
11	>lcl_NC_030853.1_mrna_XM_018119357.1_16759	0,000000	0,000000	0,000000	0,000000	0,024451	0,0048902	PREDICTED: exopolygalacturonase
12	>lcl_NC_030854.1_mrna_XM_018122147.1_19941	422200120	423955775	392789491	267203502	263767505	3.53983e+08	PREDICTED: superoxide dismutase
13	>lcl_NC_030851.1_mrna_XM_018115786.1_6828	3014691	8773488	5013404	7147138	7671841	6.32411e+06	PREDICTED: alpha-galactosidase isoform X1
14	>lcl_NC_030859.1_mrna_XM_018128586.1_33416	1009836	0,717416	0,904237	0,653791	1109529	1.05968e+06	PREDICTED: serine/threonine-protein kinase-like protein CCR2
15	>lcl_NC_030857.1_mrna_XM_007020152.2_28189	49306683	113382272	25549299	5812268	15205443	41851193	PREDICTED: laccase-14
16	>lcl_NC_030854.1_mrna_XM_007028955.2_19092	22622483	14457611	20572730	19683515	13626037	1.81925e+07	PREDICTED: peroxidase A2
17	>lcl_NC_030853.1_mrna_XM_007033525.2_15125	0,232120	1732409	0,079899	1478371	0,094783	1605390	PREDICTED: peroxidase 70
18	>lcl_NC_030852.1_mrna_XM_007040102.2_12731	153075600	254133617	82418772	82848898	270282135	1.68552e+08	PREDICTED: thaumatin-like protein
19	>lcl_NC_030854.1_mrna_XM_018121579.1_20289	113283813	50563043	612865213	82718823	138378419	1.99562e+08	PREDICTED: pathogenesis-related protein PR-4A
20	>lcl_NC_030857.1_mrna_XM_018126160.1_26400	1649576	0,699796	2584002	4409176	0,704014	2880918	PREDICTED: CO(2)-response secreted protease isoform X3

## Sheet: CCN51
	Supplementary table – Blast X and relative quantification of transcripts
		TRANSCRIPT	Identified Protein	Query cover	e-value	Percent Identity	ID protein
	1	>lcl_NC_030858.1_mrna_XM_007011603.2_28396	PREDICTED: aspartyl protease family protein At5g10770	0.77	0	1	XP_007011665.2
	2	>lcl_NC_030858.1_mrna_XM_007016002.2_31755	PREDICTED: superoxide dismutase	0.61	3e-145	1	XP_007016064.2
	3	>lcl_NC_030857.1_mrna_XM_007017133.2_25900	PREDICTED: subtilisin-like protease SBT1.9	0.87	0	1	XP_007017195.2
	4	>lcl_NC_030857.1_mrna_XM_007017279.2_25991	PREDICTED: serine carboxypeptidase II-3 isoform X1	0.78	0	1	XP_007017341.2
	5	>lcl_NC_030857.1_mrna_XM_007017859.2_26442	PREDICTED: plastocyanin	0.61	7e-79	1	XP_007017921.1
	6	>lcl_NC_030857.1_mrna_XM_007018481.2_26945	PREDICTED: subtilisin-like protease SBT1.7	0.8	0	1	XP_007018543.2
	7	>lcl_NC_030853.1_mrna_XM_007033527.2_15127	PREDICTED: cationic peroxidase 1	0.8	0	1	XP_007033589.2
	8	>lcl_NC_030851.1_mrna_XM_007042965.2_6731	PREDICTED: beta-xylosidase/alpha-L-arabinofuranosidase 2	0.78	0	1	XP_007043027.2
	9	>lcl_NC_030851.1_mrna_XM_007044667.2_8147	PREDICTED: uncharacterized protein LOC18609521	0.55	7e-94	1	XP_007044729.1
	10	>lcl_NC_030850.1_mrna_XM_007047113.2_644	PREDICTED: peroxidase 10	0.69	0	1	XP_007047175.2
	11	>lcl_NC_030850.1_mrna_XM_007051131.2_3841	PREDICTED: acidic endochitinase	0.74	0	1	XP_007051193.2
	12	>lcl_NC_030850.1_mrna_XM_007052272.2_4800	PREDICTED: uclacyanin-3	0.58	9e-74	1	XP_007052334.2
	13	>lcl_NC_030851.1_mrna_XM_018116482.1_6370	PREDICTED: probable beta-D-xylosidase 5	0.89	0	1	XP_017971971.1
	14	>lcl_NC_030850.1_mrna_XM_018117000.1_1470	PREDICTED: uncharacterized protein LOC108661114	0.94	0	1	XP_017972489.1
	15	>lcl_NC_030852.1_mrna_XM_018117818.1_10207	PREDICTED: germin-like protein subfamily T member 2	0.53	5e-155	1	XP_017973307.1
	16	>lcl_NC_030850.1_mrna_XM_018118891.1_2577	PREDICTED: cysteine-rich repeat secretory protein 55	0.73	8e-178	1	XP_017974380.1
	17	>lcl_NC_030853.1_mrna_XM_018119357.1_16759	PREDICTED: exopolygalacturonase	0.97	0	1	XP_017974846.1
	18	>lcl_NC_030854.1_mrna_XM_018121579.1_20289	PREDICTED: pathogenesis-related protein PR-4A	0.72	2e-164	1	XP_017977068.1
	19	>lcl_NC_030854.1_mrna_XM_018122149.1_19942	PREDICTED: superoxide dismutase	0.54	7e-101	1	XP_017977636.1
	20	>lcl_NC_030856.1_mrna_XM_018124420.1_25759	PREDICTED: homeobox protein ESX1-like	0.99	1e-37	1	XP_017979909.1
	21	>lcl_NC_030859.1_mrna_XM_018128586.1_33416	PREDICTED: serine/threonine-protein kinase-like protein CCR2	0.84	0	1	XP_017984075.1
	22	>lcl_NC_030857.1_mrna_XM_007017808.2_26401	PREDICTED: CO(2)-response secreted protease isoform X2	0.82	0	1	XP_007017870.2
	23	>lcl_NC_030857.1_mrna_XM_007020152.2_28189	PREDICTED: laccase-14	0.8	0	1	XP_007020214.1
	24	>lcl_NC_030855.1_mrna_XM_007023231.2_21239	PREDICTED: basic blue protein	0.63	7e-78	1	XP_007023293.1
	25	>lcl_NC_030855.1_mrna_XM_007024412.2_22171	PREDICTED: cysteine-rich repeat secretory protein 38	0.66	2e-159	1	XP_007024474.2
	26	>lcl_NC_030854.1_mrna_XM_007028955.2_19092	PREDICTED: peroxidase A2	0.73	0	1	XP_007029017.2
	27	>lcl_NC_030853.1_mrna_XM_007033739.2_15288	PREDICTED: endochitinase EP3	0.78	0	1	XP_007033801.1
	28	>lcl_NC_030852.1_mrna_XM_007040102.2_12731	PREDICTED: thaumatin-like protein	0.69	2e-149	1	XP_007040164.2
	29	>lcl_NC_030850.1_mrna_XM_007046487.2_140	PREDICTED: basic endochitinase	0.76	0	1	XP_007046549.2
	30	>lcl_NC_030850.1_mrna_XM_007051131.2_3841	PREDICTED: acidic endochitinase	0.74	0	1	XP_007051193.2
	31	>lcl_NC_030855.1_mrna_XM_018123556.1_21197	PREDICTED: alpha-galactosidase isoform X1	0.8	0	1	XP_017979043.1
	32	>lcl_NC_030859.1_mrna_XM_018128966.1_32739	PREDICTED: probably inactive leucine-rich repeat receptor-like protein kinase IMK2 isoform X1	0.82	0	1	XP_017984455.1
	33	>lcl_NC_030859.1_mrna_XM_018129622.1_34354	PREDICTED: acidic endochitinase	0.87	0	1	XP_017985111.1

## Sheet: CONTROL2
CONTROL
	Name	TPM (1)	TPM (2)	TPM (3)	TPM (4)	TPM (5)	Mean	Protein
1	>lcl_NC_030858.1_mrna_XM_007011603.2_28396	59333134	98551676	227068795	84833973	43354872	102628490	PREDICTED: aspartyl protease family protein At5g10770
2	>lcl_NC_030858.1_mrna_XM_007016002.2_31755	807675355	759482202	1123458088	1120960850	913297502	9.44975e+08	PREDICTED: superoxide dismutase (2)
3	>lcl_NC_030857.1_mrna_XM_007017133.2_25900	16758154	19080039	7025809	6413656	41666301	1.81888e+07	PREDICTED: subtilisin-like protease SBT1.9
4	>lcl_NC_030857.1_mrna_XM_007017279.2_25991	18769519	17157482	22734274	21624801	22910244	20639264	PREDICTED: serine carboxypeptidase II-3 isoform X1
5	>lcl_NC_030857.1_mrna_XM_007017859.2_26442	3303913918	4553758312	5056738510	4884346214	1620176170	3.88379e+09	PREDICTED: plastocyanin
6	>lcl_NC_030857.1_mrna_XM_007018481.2_26945	36907418	52587857	108255923	105086868	15542442	6.36761e+07	PREDICTED: subtilisin-like protease SBT1.7
7	>lcl_NC_030853.1_mrna_XM_007033527.2_15127	1650519	0,697840	1916873	1213143	1735394	1.62898e+06	PREDICTED: cationic peroxidase 1
8	>lcl_NC_030851.1_mrna_XM_007042965.2_6731	11341911	103849729	37509169	9746764	121347319	5.6759e+07	PREDICTED: beta-xylosidase/alpha-L-arabinofuranosidase 2
9	>lcl_NC_030851.1_mrna_XM_007044667.2_8147	0,000000	0,024068	0,000000	0,000000	0,000000	0,048136	PREDICTED: uncharacterized protein LOC18609521
10	>lcl_NC_030850.1_mrna_XM_007047113.2_644	3295890	0,726950	2442761	0,935483	3402338	3.047e+06	PREDICTED: peroxidase 10
11	>lcl_NC_030850.1_mrna_XM_007051131.2_3841	9017796	1744612	3350421	5363855	0,661896	4869171	PREDICTED: acidic endochitinase (1)
12	>lcl_NC_030850.1_mrna_XM_007052272.2_4800	12323751	8112369	49496136	32274482	3775744	2.11965e+07	PREDICTED: uclacyanin-3
13	>lcl_NC_030851.1_mrna_XM_018116482.1_6370	0,342175	0,453087	0,986444	0,479663	0,672222	0,5867182	PREDICTED: probable beta-D-xylosidase 5
14	>lcl_NC_030850.1_mrna_XM_018117000.1_1470	0,030523	0,035426	0,038954	0,046639	0,000000	0,0303084	PREDICTED: uncharacterized protein LOC108661114
15	>lcl_NC_030852.1_mrna_XM_018117818.1_10207	41901593	22410075	17576672	22988734	17258552	2.44271e+07	PREDICTED: germin-like protein subfamily T member 2
16	>lcl_NC_030850.1_mrna_XM_018118891.1_2577	1016212	0,223637	0,246110	0,170224	5293213	3.15471e+06	PREDICTED: cysteine-rich repeat secretory protein 55
17	>lcl_NC_030853.1_mrna_XM_018119357.1_16759	0,011579	0,000000	0,028011	0,000000	0,012715	0,052305	PREDICTED: exopolygalacturonase
18	>lcl_NC_030854.1_mrna_XM_018121579.1_20289	18785542	85541221	26261840	411804746	6740962	1.09827e+08	PREDICTED: pathogenesis-related protein PR-4A
19	>lcl_NC_030854.1_mrna_XM_018122149.1_19942	148187675	67071726	74516824	62800034	167423351	103999922	PREDICTED: superoxide dismutase
20	>lcl_NC_030856.1_mrna_XM_018124420.1_25759	1670723	1394149	3591940	4511046	2822833	2.79814e+06	PREDICTED: homeobox protein ESX1-like
21	>lcl_NC_030859.1_mrna_XM_018128586.1_33416	0,150564	0,390261	0,123382	0,219063	0,625314	0,3017168	PREDICTED: serine/threonine-protein kinase-like protein CCR2
22	>lcl_NC_030857.1_mrna_XM_007017808.2_26401	5648257	0,279600	2096580	2188937	0,395512	3311258	PREDICTED: CO(2)-response secreted protease isoform X2
23	>lcl_NC_030857.1_mrna_XM_007020152.2_28189	18489063	69827871	8164898	11675565	135743641	4.87802e+07	PREDICTED: laccase-14
24	>lcl_NC_030855.1_mrna_XM_007023231.2_21239	0,137472	0,041088	0,292489	0,328481	0,329407	0,2257874	PREDICTED: basic blue protein
25	>lcl_NC_030855.1_mrna_XM_007024412.2_22171	0,607458	0,422492	18865315	0,229712	0,000000	18865315	PREDICTED: cysteine-rich repeat secretory protein 38
26	>lcl_NC_030854.1_mrna_XM_007028955.2_19092	11726710	5815858	6287359	22340109	4254101	1.00848e+07	PREDICTED: peroxidase A2
27	>lcl_NC_030853.1_mrna_XM_007033739.2_15288	12792536	5687718	35334005	11359005	5295079	1.40937e+07	PREDICTED: endochitinase EP3
28	>lcl_NC_030852.1_mrna_XM_007040102.2_12731	1689096	1017440	19555798	2062640	0,436366	6.08124e+06	PREDICTED: thaumatin-like protein
29	>lcl_NC_030850.1_mrna_XM_007046487.2_140	0,111617	0,171078	1525493	0,130219	0,034815	1525493	PREDICTED: basic endochitinase
30	>lcl_NC_030850.1_mrna_XM_007051131.2_3841	9017796	1744612	3350421	5363855	0,661896	4869171	PREDICTED: acidic endochitinase (2)
31	>lcl_NC_030855.1_mrna_XM_018123556.1_21197	13264999	0,541780	1200475	1072341	3323014	4.71521e+06	PREDICTED: alpha-galactosidase isoform X1
32	>lcl_NC_030859.1_mrna_XM_018128966.1_32739	0,403303	14078786	0,511317	0,548858	2531118	8304952	PREDICTED: probably inactive leucine-rich repeat receptor-like protein kinase IMK2 isoform X1
33	>lcl_NC_030859.1_mrna_XM_018129622.1_34354	0,727405	2514018	2631199	4414234	0,763787	3.18648e+06	PREDICTED: acidic endochitinase

## Sheet: INFECTED2
Infected
	Name	TPM (1)	TPM (2)	TPM (3)	TPM (4)	TPM (5)	Mean	Protein
1	>lcl_NC_030858.1_mrna_XM_007011603.2_28396	225712208	330503834	406090761	461443587	295441112	3.43838e+08	PREDICTED: aspartyl protease family protein At5g10770
2	>lcl_NC_030858.1_mrna_XM_007016002.2_31755	356817604	338797577	299637011	338099429	585355055	3.83741e+08	PREDICTED: superoxide dismutase (2)
3	>lcl_NC_030857.1_mrna_XM_007017133.2_25900	22596444	11180513	7466241	11628344	17142595	1.40028e+07	PREDICTED: subtilisin-like protease SBT1.9
4	>lcl_NC_030857.1_mrna_XM_007017279.2_25991	49470440	50752078	28830784	38851754	29792374	39539486	PREDICTED: serine carboxypeptidase II-3 isoform X1
5	>lcl_NC_030857.1_mrna_XM_007017859.2_26442	742971600	432669624	2028998188	2098872182	3339329826	1728568284	PREDICTED: plastocyanin
6	>lcl_NC_030857.1_mrna_XM_007018481.2_26945	38318254	79819184	133512792	117095723	107418893	9.5233e+07	PREDICTED: subtilisin-like protease SBT1.7
7	>lcl_NC_030853.1_mrna_XM_007033527.2_15127	11540617	17793191	12303920	9746529	20980876	1.4473e+07	PREDICTED: cationic peroxidase 1
8	>lcl_NC_030851.1_mrna_XM_007042965.2_6731	59184330	104727700	57758521	72578394	107848251	8.04194e+07	PREDICTED: beta-xylosidase/alpha-L-arabinofuranosidase 2
9	>lcl_NC_030851.1_mrna_XM_007044667.2_8147	1658684	0,388412	0,327081	0,000000	0,042778	1658684	PREDICTED: uncharacterized protein LOC18609521
10	>lcl_NC_030850.1_mrna_XM_007047113.2_644	34062889	55184138	18386394	18052526	12321397	2.76015e+07	PREDICTED: peroxidase 10
11	>lcl_NC_030850.1_mrna_XM_007051131.2_3841	1918440	4536047	32172088	12156771	13884715	1.29336e+07	PREDICTED: acidic endochitinase (1)
12	>lcl_NC_030850.1_mrna_XM_007052272.2_4800	58659116	70059533	48486196	19252863	19823893	4.32563e+07	PREDICTED: uclacyanin-3
13	>lcl_NC_030851.1_mrna_XM_018116482.1_6370	0,248853	1224637	0,286631	0,774598	0,674008	1224637	PREDICTED: probable beta-D-xylosidase 5
14	>lcl_NC_030850.1_mrna_XM_018117000.1_1470	0,000000	0,048659	0,068371	0,063884	0,054877	0,0471582	PREDICTED: uncharacterized protein LOC108661114
15	>lcl_NC_030852.1_mrna_XM_018117818.1_10207	22247450	18821800	19217127	18658030	14167954	1.86225e+07	PREDICTED: germin-like protein subfamily T member 2
16	>lcl_NC_030850.1_mrna_XM_018118891.1_2577	6986761	11419616	0,952869	1353734	2171651	5.48294e+06	PREDICTED: cysteine-rich repeat secretory protein 55
17	>lcl_NC_030853.1_mrna_XM_018119357.1_16759	0,000000	0,000000	0,000000	0,000000	0,024451	0,0048902	PREDICTED: exopolygalacturonase
18	>lcl_NC_030854.1_mrna_XM_018121579.1_20289	113283813	50563043	612865213	82718823	138378419	1.99562e+08	PREDICTED: pathogenesis-related protein PR-4A
19	>lcl_NC_030854.1_mrna_XM_018122149.1_19942	147967633	173380409	121377459	92621544	106497601	1.28369e+08	PREDICTED: superoxide dismutase
20	>lcl_NC_030856.1_mrna_XM_018124420.1_25759	3525630	0,810086	1711813	2690964	1203039	2.28286e+06	PREDICTED: homeobox protein ESX1-like
21	>lcl_NC_030859.1_mrna_XM_018128586.1_33416	1009836	0,717416	0,904237	0,653791	1109529	1.05968e+06	PREDICTED: serine/threonine-protein kinase-like protein CCR2
22	>lcl_NC_030857.1_mrna_XM_007017808.2_26401	0,097079	0,611890	0,076812	0,085455	0,066291	0,3348238097	PREDICTED: CO(2)-response secreted protease isoform X2
23	>lcl_NC_030857.1_mrna_XM_007020152.2_28189	49306683	113382272	25549299	5812268	15205443	41851193	PREDICTED: laccase-14
24	>lcl_NC_030855.1_mrna_XM_007023231.2_21239	14118375	1220392	1117108	2818866	3337570	4.52246e+06	PREDICTED: basic blue protein
25	>lcl_NC_030855.1_mrna_XM_007024412.2_22171	12540707	16649989	7877891	11856008	40583870	17901693	PREDICTED: cysteine-rich repeat secretory protein 38
26	>lcl_NC_030854.1_mrna_XM_007028955.2_19092	22622483	14457611	20572730	19683515	13626037	1.81925e+07	PREDICTED: peroxidase A2
27	>lcl_NC_030853.1_mrna_XM_007033739.2_15288	56438603	135536128	45859037	49553237	57707653	6.90189e+07	PREDICTED: endochitinase EP3
28	>lcl_NC_030852.1_mrna_XM_007040102.2_12731	153075600	254133617	82418772	82848898	270282135	1.68552e+08	PREDICTED: thaumatin-like protein
29	>lcl_NC_030850.1_mrna_XM_007046487.2_140	2200107	3209712	2081742	2440206	2564442	2.49924e+06	PREDICTED: basic endochitinase
30	>lcl_NC_030850.1_mrna_XM_007051131.2_3841	1918440	4536047	32172088	12156771	13884715	1.29336e+07	PREDICTED: acidic endochitinase (2)
31	>lcl_NC_030855.1_mrna_XM_018123556.1_21197	1914061	2413618	1058526	1936185	0,723832	1.8306e+06	PREDICTED: alpha-galactosidase isoform X1
32	>lcl_NC_030859.1_mrna_XM_018128966.1_32739	1175863	0,818139	2102115	1971448	5072135	2.58039e+06	PREDICTED: probably inactive leucine-rich repeat receptor-like protein kinase IMK2 isoform X1
33	>lcl_NC_030859.1_mrna_XM_018129622.1_34354	0,684520	1103618	184961660	138379276	71453746	98974575	PREDICTED: acidic endochitinase
